# Supplementary figures and images for: A Colored Traveling Salesman Problem with Varying City Colors
Source: Hindawi journal article supplement (doi:10.1155/2021/4533483), 2021-12-09

## Supplementary Materials

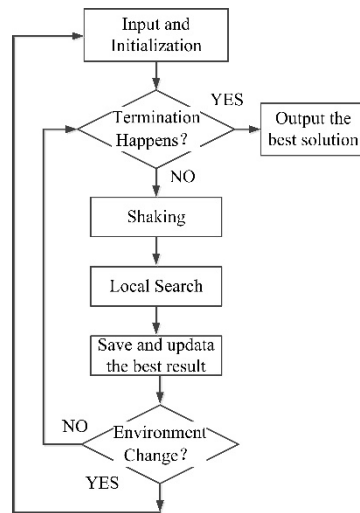

Figure S1: The flowchart of VNS.

Supplement: f1 [file 4533483.f1.pdf]
